# Supplementary material
Source: PubMed Central journal article supplement (PMC2718841)
Supplement: fj.08-122820_1.pdf [file fj.08-122820_1.pdf]

## SUPPLEMENTAL METHODS

### Analytical solution of interstitial flow velocity across a gel scaffold

Permeability of a collagen gel scaffold was measured by monitoring displacement of medium level in reservoirs. The Darcy permeability ( $K$ ) of the gel scaffold with hepatocytes was then determined by Darcy’s law:

$$\frac{Q(t)}{A} = \frac{K}{\mu} \frac{\Delta P(t)}{L} \quad (1)$$

where  $Q$  is the volumetric flow rate measured by the displacement of medium level in reservoirs,  $A$  is the average surface area of the gel scaffold,  $\mu$  is viscosity,  $P$  is pressure, and  $L$  is the length of the gel scaffold.

The pressure in the reservoir changes with decreasing reservoir column height ( $\Delta z$ ):

$$\Delta P(t) = \rho g \Delta z(t) \quad (2)$$

$$\Delta z(t) = \Delta z_0 - \frac{1}{A_r} \int Q(t) dt \quad (3)$$

where  $\Delta z_0$  is 5 mm,  $\rho$  is density,  $g$  is gravity acceleration, and  $A_r$  is the surface area of the reservoir.

Equations (1)–(3) give

$$Q(t) = \frac{\rho g A K \Delta z_0}{\mu L} e^{-\frac{\rho g A K}{\mu A_r L} t} \quad (4)$$

$$V(t) = \int Q(t)dt = A_r \Delta z_0 \left( 1 - e^{-\frac{\rho g A K}{\mu A_r L} t} \right) \quad (5)$$

where  $V(t)$  is displaced volume in the reservoir.

By transforming equation (5), the Darcy permeability ( $K$ ) was given

$$K = -\frac{\mu L A_r}{\rho g A t_1} \log \left\{ 1 - \frac{V(t)}{A \Delta z_0} \right\} \quad (7)$$

We measured the displacement of the medium level in the reservoirs during 24-h culture to be 0.583 mm (n=20, N=3). The displacement was then used to calculate  $V(t=24 \text{ h})$ .

The Darcy permeability was calculated by combining the displacement measurement and equation (7) and given as  $K=8.9 \times 10^{-15} [\text{m}^2]$ . The interstitial flow velocity across the gel scaffold,  $v(t)$  is given as

$$v(t) = \frac{Q}{A} = \frac{\rho g K \Delta z_0}{\mu L} e^{-\frac{\rho g A K}{\mu A_r L} t} \quad (8)$$

The velocity distribution was plotted using MATLAB.

## SUPPLEMENTAL FIGURES

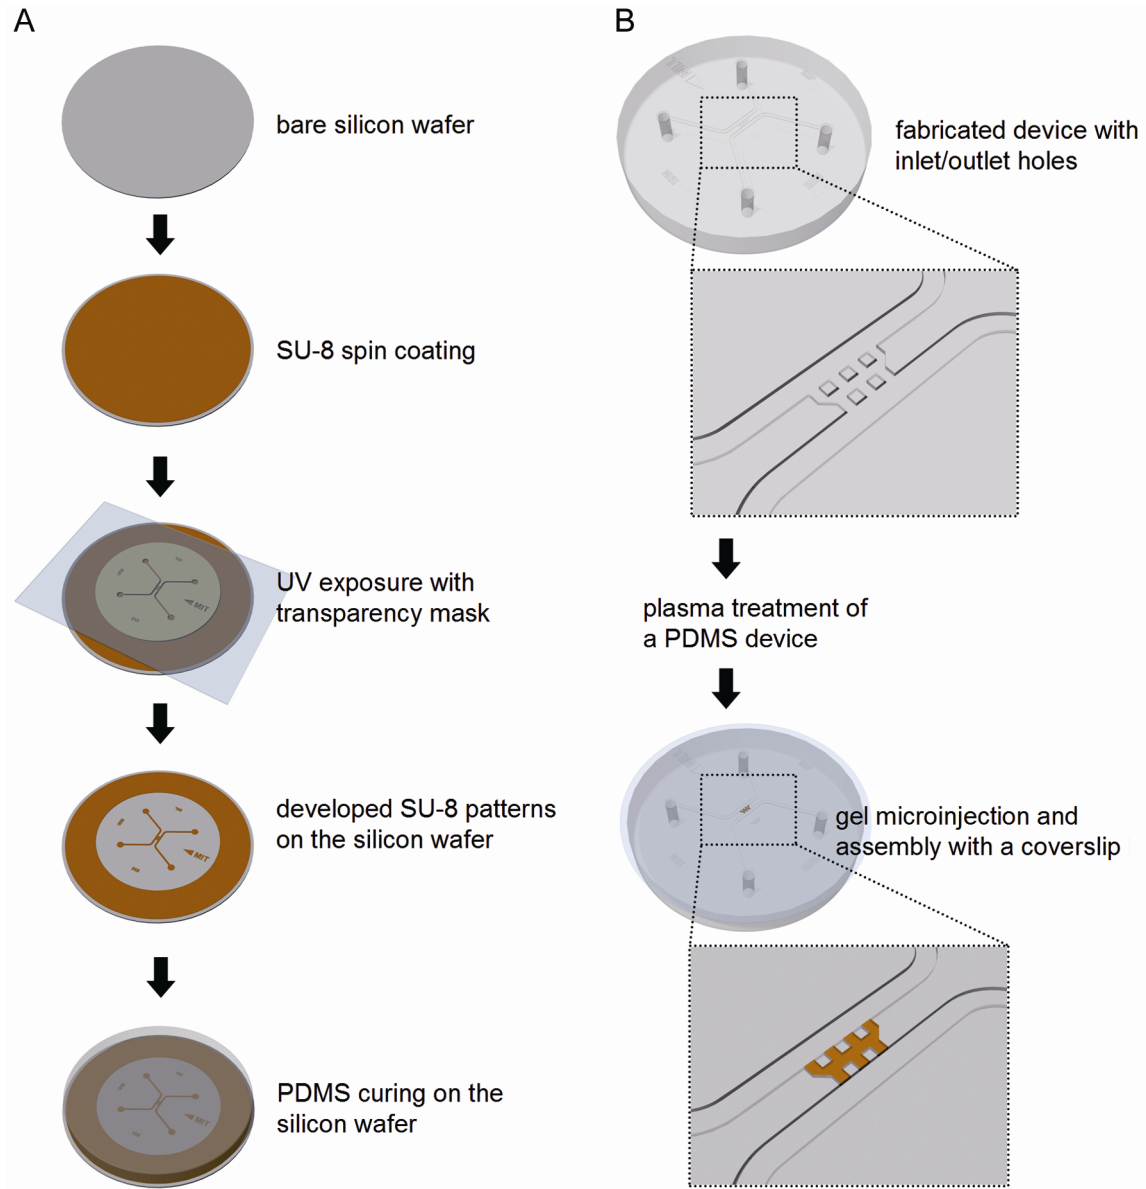

**Supplemental Figure 1 Microfabrication of the microfluidic device.** (A) Soft lithography process.

(B) Collagen gel microinjection and assembly of the PDMS device.

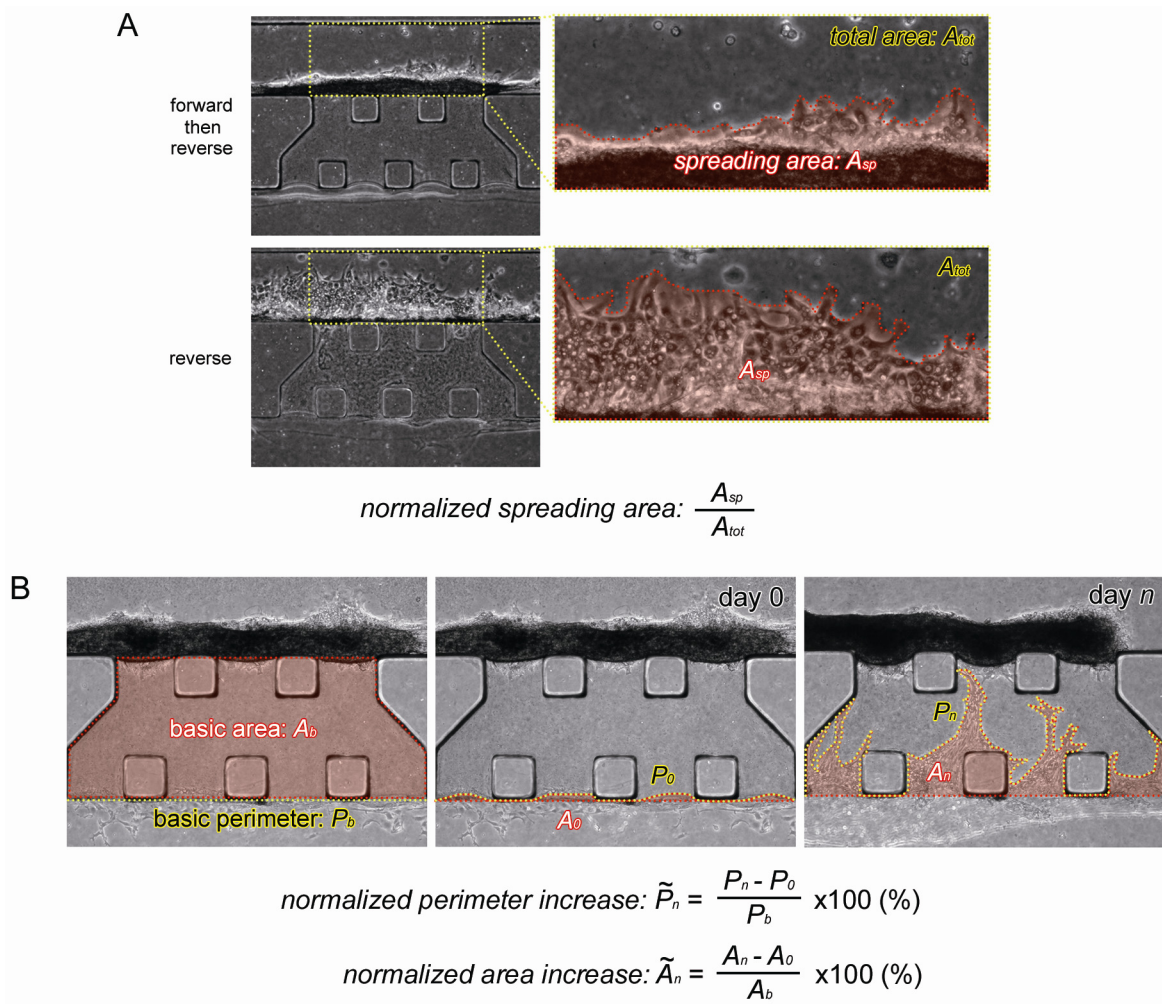

**Supplemental Figure 2 Quantification of cell morphogenesis.** (A) Hepatocyte morphogenesis in the presence of interstitial flow quantified by calculating “normalized spreading area”. (B) Migration of rMVEC in hepatocyte-rMVEC coculture quantified by calculating “normalized perimeter increase” and “normalized area increase”.

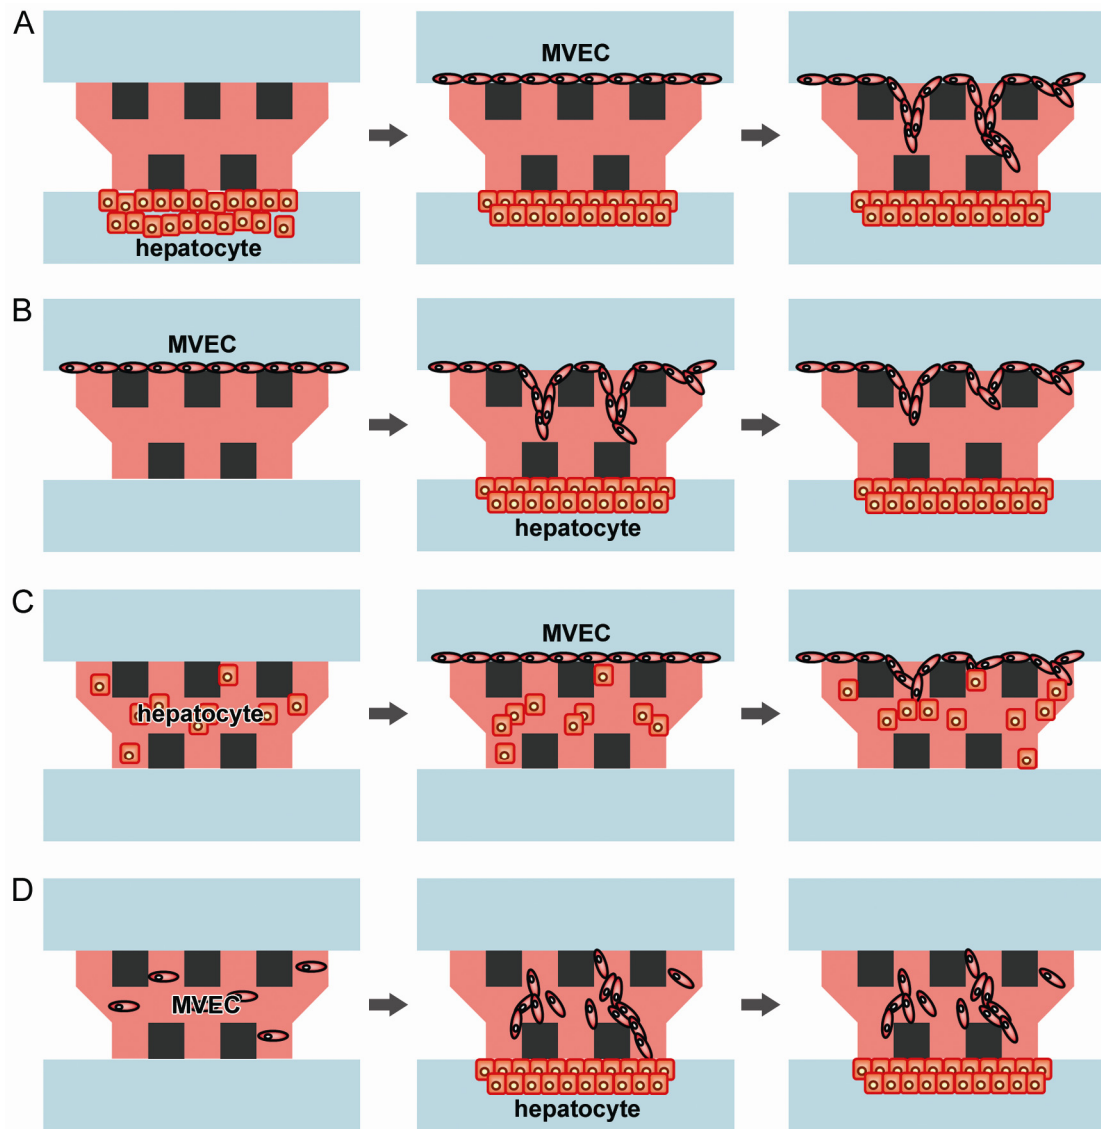

**Supplemental Figure 3 Possible configurations of the hepatocyte-MVEC coculture. (A)**

Hepatocytes are seeded on the sidewall of a gel scaffold. After hepatocytes form 3D tissue-like structures, MVEC are added to the other side. (B) MVEC are seeded on one side. After MVEC penetrate into a gel scaffold and form capillary-like structures, hepatocytes are added to the other side. (C) Hepatocytes are embedded in a gel scaffold and MVEC are seeded on the sidewall of the gel scaffold. (D) MVEC are embedded in a gel scaffold and hepatocytes are seeded on the sidewall of the gel scaffold.

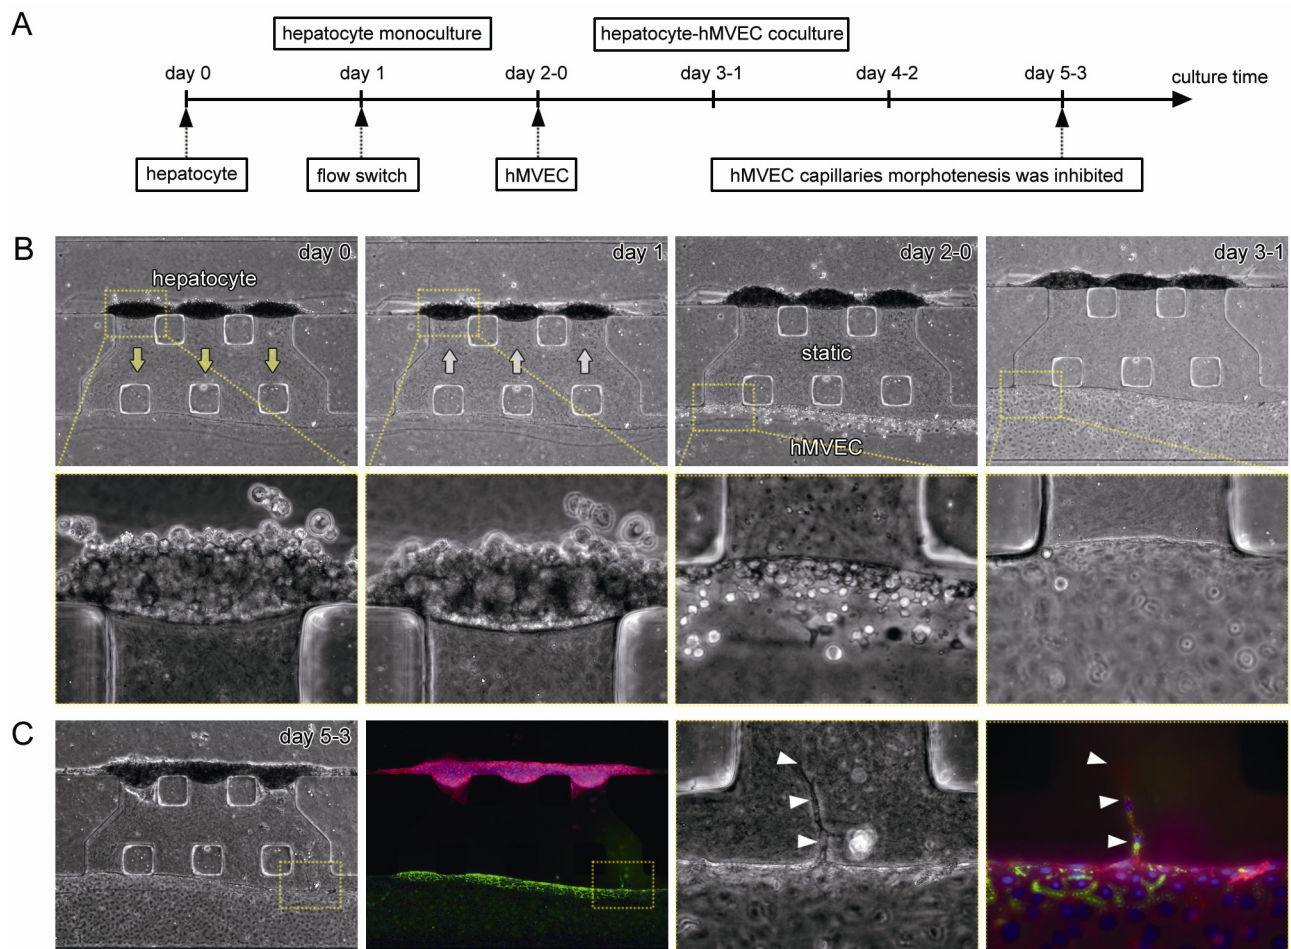

**Supplemental Figure 4** Hepatocyte-hMVEC coculture. (A) Experimental protocol of the coculture.

(B) Corresponding phase-contrast images of the cells. Arrows indicate the direction of interstitial flow.

Hepatocytes were seeded on one side of a collagen gel scaffold. hMVEC were added to the other side on day 2. (C) The left pair represent corresponding phase-contrast and fluorescent images of cells. The

cells were fixed on day 5-3 and stained for actin filaments (red), von Willebrand factor (green), and nuclei (blue). The right pair represents enlarged images of the dotted frame shown in the left pair.

Arrowheads indicate a vascular sprout formed on day 5-3.

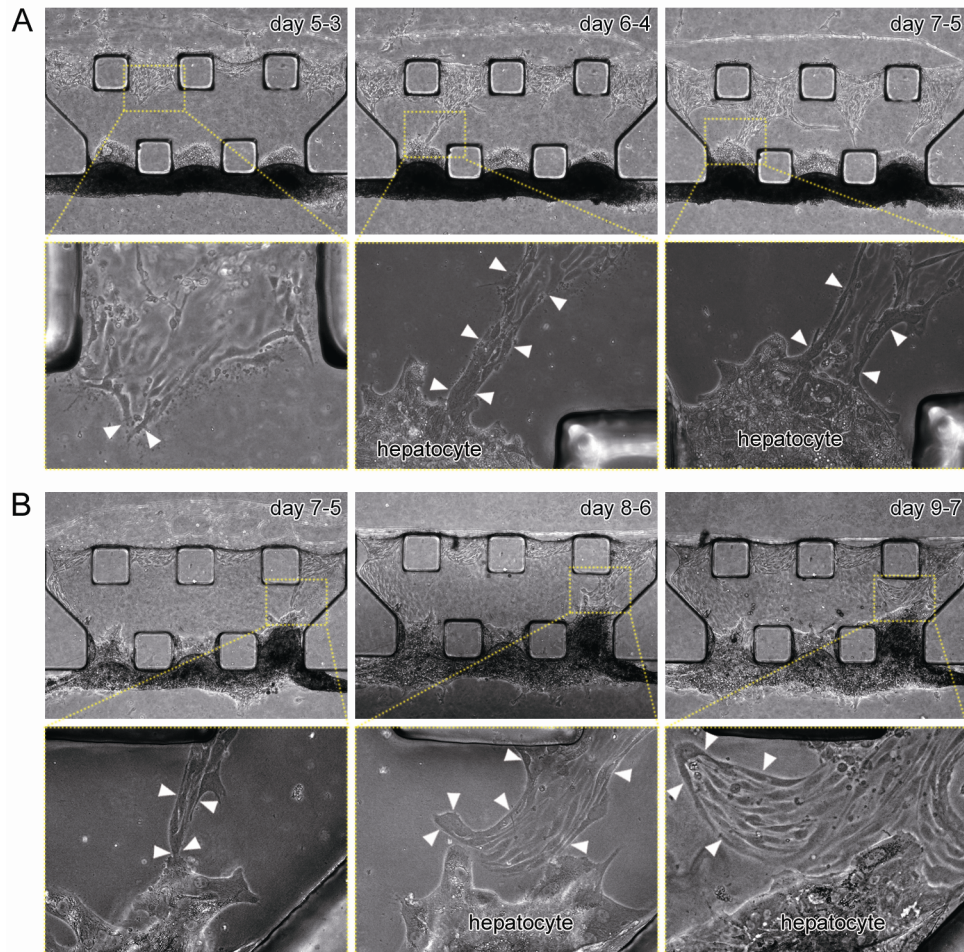

**Supplemental Figure 5 rMVEC capillary-like structures in contact with hepatocyte tissue-like structures.** (A) Cells cultured under static conditions. A capillary-like structure attached a hepatocyte tissue-like structure on day 6-4 (arrowheads, day 6-4). rMVEC remain attached to hepatocytes on the following day (arrowheads, day 7-5). (B) Cells cultured under forward flow, followed by reverse flow and static conditions. A capillary-like structure became attached to hepatocytes on day 7-5. The capillary-like structure deviated after attaching to the hepatocyte tissue-like structure.

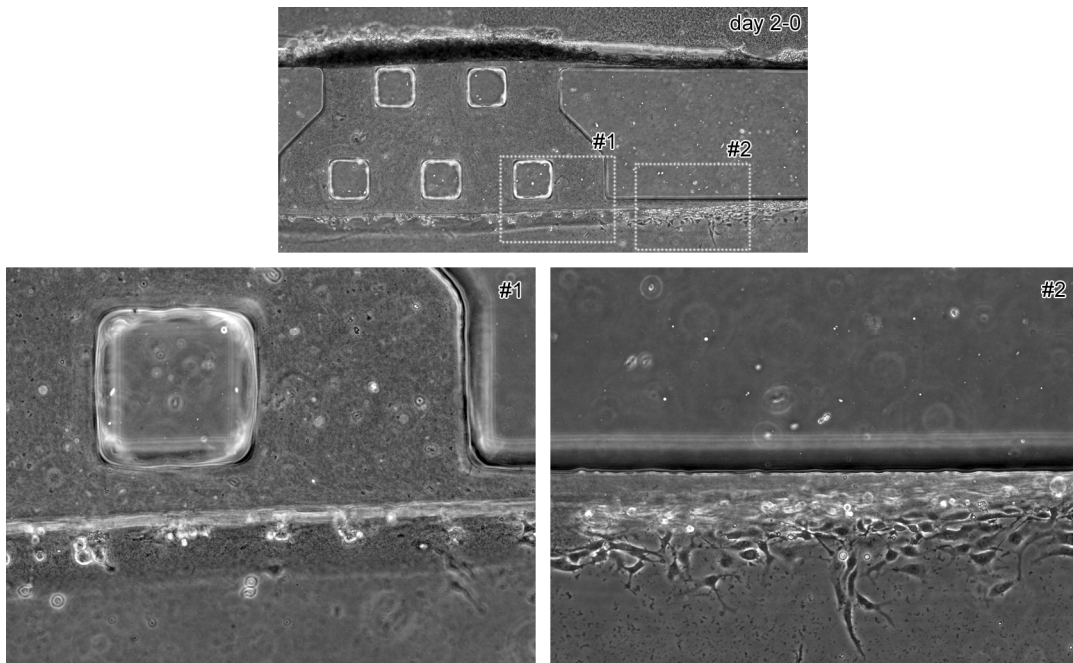

**Supplemental Figure 6 Phase-contrast images of the cells in hepatocyte-rMVEC coculture.** Cells were photographed 5 h after rMVEC addition. rMVEC attached and spread on the hepatocyte-free portion of a collagen gel scaffold surface (#2). However, fewer rMVEC attached and spread on the gel surface that was exposed to hepatocytes (#1). Similar phenomena were also observed in hepatocyte-hMVEC coculture.
